# Supplementary material for: SHARAD Observations of Temporal Variations of CO2 Ice Deposits at the South Pole of Mars
Source: MDPI journal article supplement (doi:10.3390/rs14030435), 2022-01-18
Supplement: s1 [file s1]

## Supplementary Materials

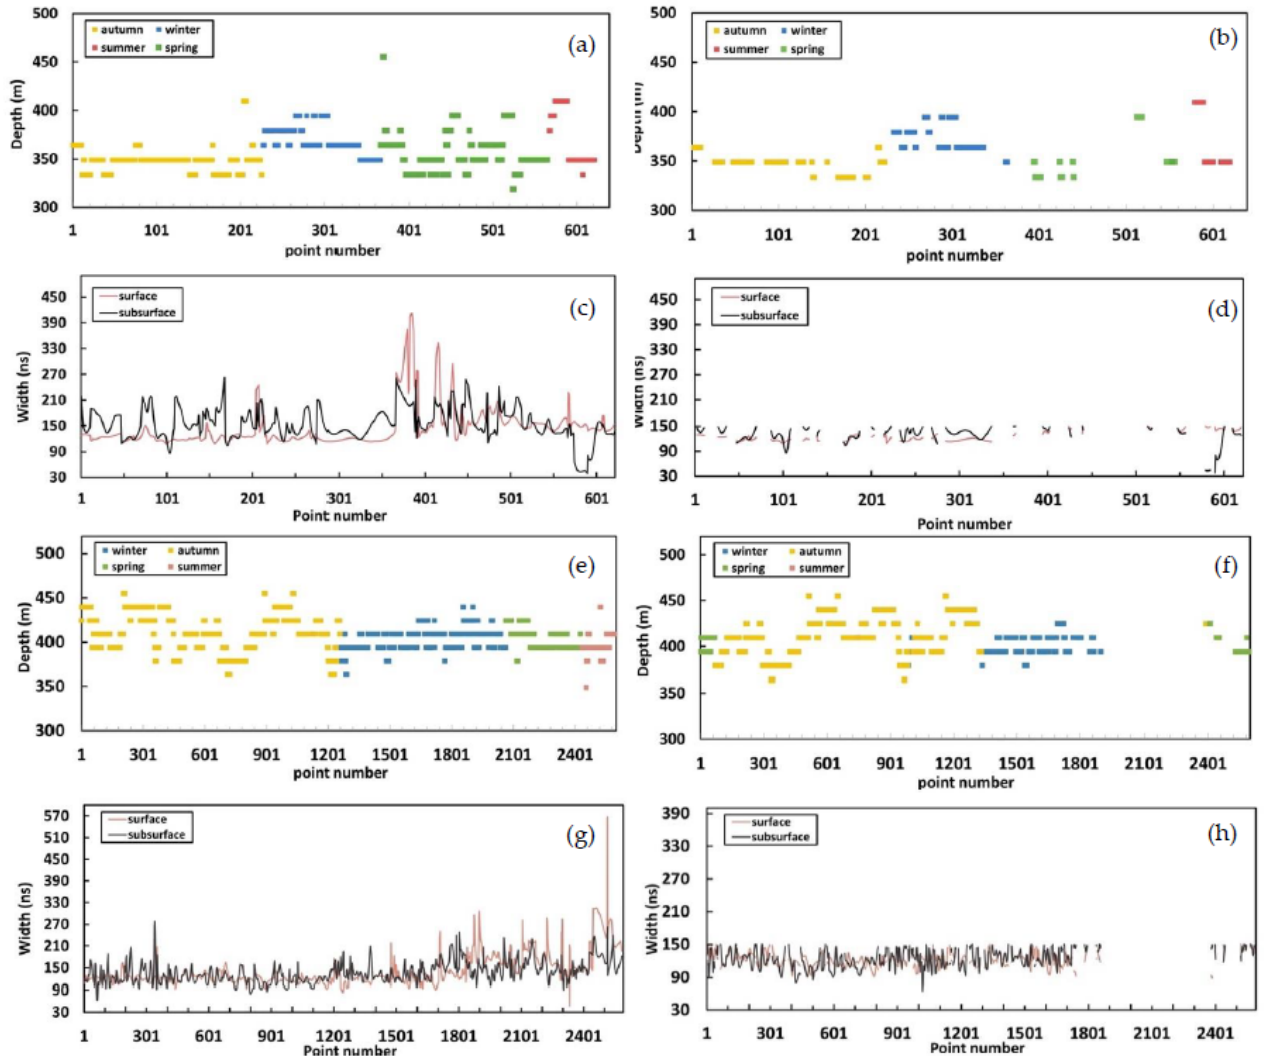

**Figure S1.** This group of pictures shows the thickness of  $AA_{3c}$  and the echo's width of the subsatellite point before and after filtering data in S1 (Figure S1 (a–d)) and S3 (Figure S1 (e–h)). Figure S1 (a,c), respectively, show the thickness of  $AA_{3c}$  and the width of the echo at 3dB before filtering the data. In Figure (a) the different colors represent different seasons, the red line in Figure (c) represents the width of the surface echo, and the black line represents the width of the subsurface echo. The right column, or Figure (b) and (d), shows the points of FWHM <150 ns in the same area. Figure S1.(e–h) are the same as above.

(a)

(b)

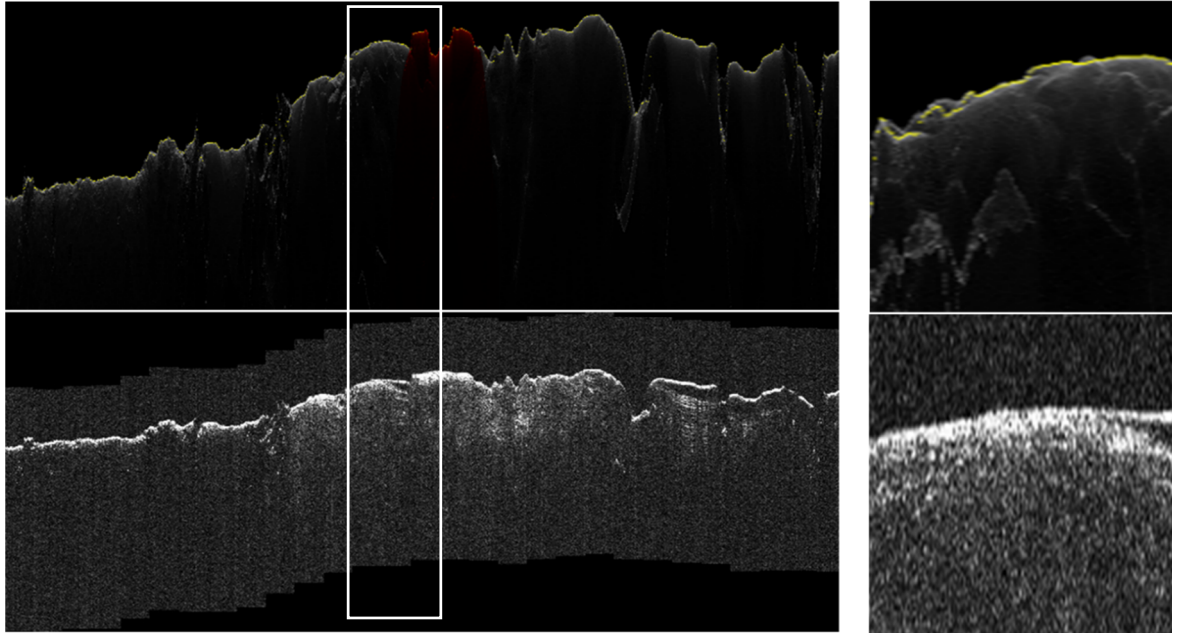

(c)

(d)

**Figure S2.** The white box shows the subsurface reflectors in SPLD, the track number is 0564201. (b) is the radargram, (a) is the clutter simulation. (c), (d) are the enlarged views in the white box.

**Table S1.** This is the supplementary material of Table 4. The index corresponds to that in Table 4. The third column CTX\_number indicates the source of each DEM. Ls is the solar longitude corresponding to each CTX.

| Region | Index | CTX_number                 | Ls (Degree) |
|--------|-------|----------------------------|-------------|
| S1     | 1     | K08_056420_0927_XN_87S072W | 227         |
|        |       | K08_056459_0926_XN_87S082W | 229         |
|        | 2     | D12_031748_0931_XI_86S094W | 313         |
|        |       | D12_031972_0931_XN_86S094W | 323         |
|        | 3     | D12_031748_0931_XI_86S094W | 313         |
|        |       | D12_031972_0931_XN_86S094W | 323         |
|        | 1     | D06_029427_0924_XI_87S072W | 201         |
|        |       | D06_029586_0932_XN_86S106W | 208         |
|        | 2     | K08_056420_0927_XN_87S072W | 227         |
|        |       | K08_056459_0926_XN_87S082W | 229         |
| S2     | 3     | K11_057660_0929_XN_87S094W | 288         |
|        |       | K11_057673_0930_XN_87S093W | 288         |
|        | 4     | J10_048772_0932_XI_86S098W | 284         |
|        |       | J10_048864_0933_XN_86S101W | 289         |
|        | 5     | D12_031748_0931_XI_86S094W | 313         |
|        |       | D12_031972_0931_XN_86S094W | 323         |
|        | 6     | G12_022781_0930_XI_87S093W | 306         |
|        |       | G12_022979_0931_XI_86S093W | 315         |
|        | 7     | G13_023124_0931_XI_86S094W | 321         |
|        |       | G13_023295_0923_XI_87S078W | 329         |
|        | 8     | D12_032038_0930_XI_87S093W | 325         |
|        |       | D12_032090_0920_XI_88S076W | 328         |
|        | 9     | P12_005787_0869_XN_86S095W | 334         |
|        |       | P12_005863_0883_XI_88S040W | 337         |
|        | 1     | D06_029427_0924_XI_87S072W | 201         |
|        |       | D06_029586_0932_XN_86S106W | 208         |
| S3     | 2     | J10_048772_0932_XI_86S098W | 284         |
|        |       | J10_048864_0933_XN_86S101W | 289         |
|        | 3     | J13_049945_0927_XN_87S093W | 337         |
|        |       | J13_049972_0930_XN_87S102W | 338         |
